# Supplementary material
Source: publisher figshare collection journal article supplement (https://sage.figshare.com/ndownloader/files/18039731)
Supplement: Supplementary file 1 [file 18039731]

## Supplementary figure

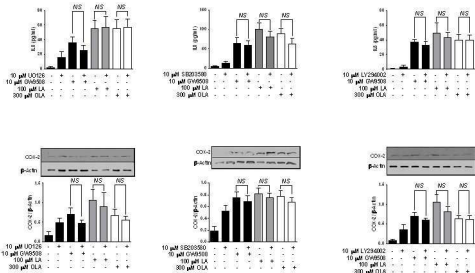

Supplementary figure. FFAR1/GPR40 agonists-stimulated COX-2 and IL-8 expression are not reduced by inhibition of a single signalling pathway. Neutrophils were incubated with UO126 (10  $\mu$ M), SB203580 (10  $\mu$ M) or LY294002 (10  $\mu$ M) for 15 min prior stimulation with GW9508 (10  $\mu$ M), LA (100  $\mu$ M) or OLA (300  $\mu$ M) for 5 h (for IL-8 ELISA) or 3 h (for COX-2 immunoblot). IL-8 production was analysed by ELISA and COX-2 protein levels were analysed by immunoblot, using  $\beta$ -actin for normalization, and densitometric analysis is shown in bar graphs. (Mean  $\pm$  SEM of 5 independent experiments). NS: Not significant.
